# Supplementary material
Source: Springer Nature journal article supplement (https://www.springermedizin.de/resource/supplementary/13054_2005_3676_MOESM2_ESM.pdf/9721040)

# Under 65

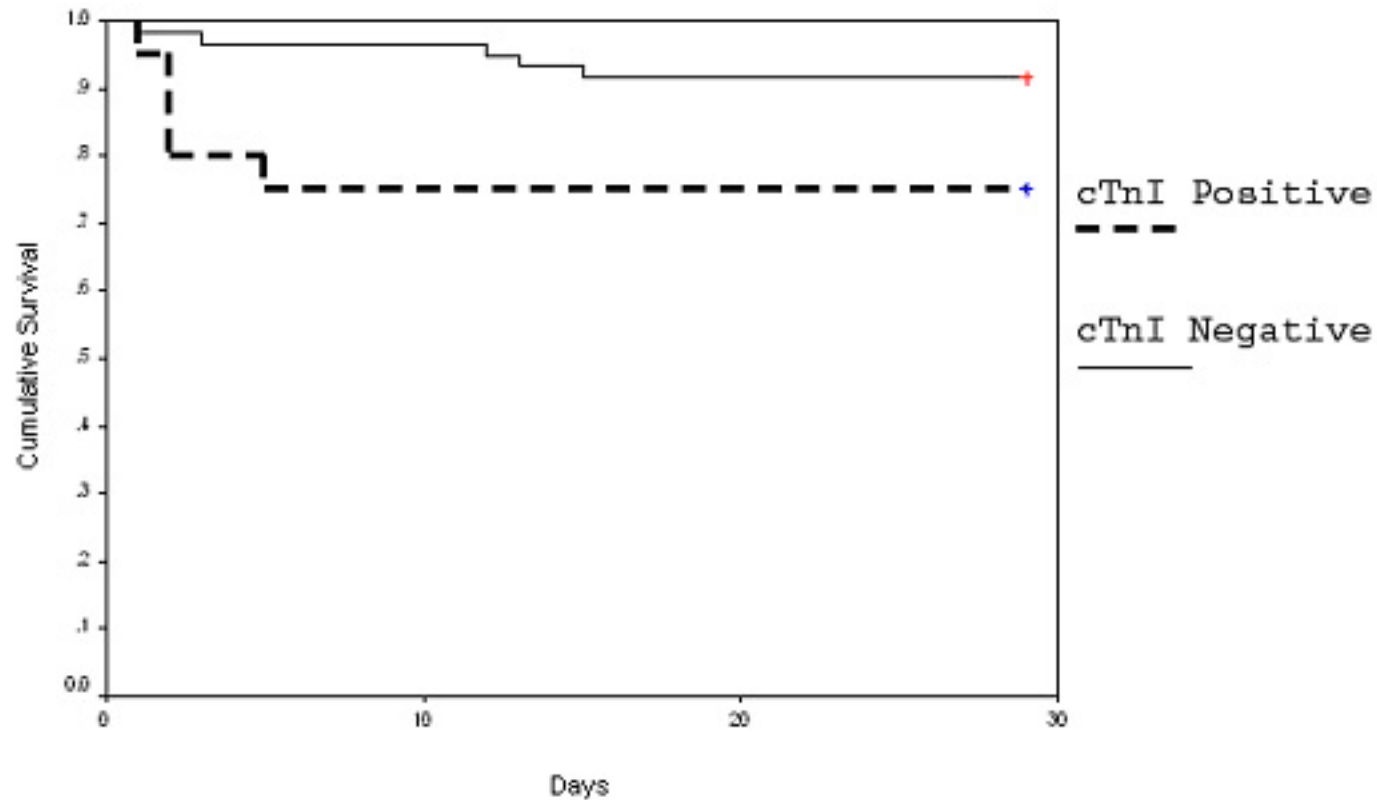

Supplement: MOESM2 [file 9721040]
